# Supplementary material for: The Canine Gut Health: Impact of a New Feed Supplement on Microbiota Composition
Source: Preprints.org preprint supplement (doi:10.20944/preprints202403.1836.v1), 2024-03-29
Supplement: Supplementary file 1 [file supplementary]

Article

# The Canine Gut Health: Impact of a New Feed Supplement on Microbiota Composition

## Supplementary Materials

Supplemental Table 1: Guaranteed Analysis of commercially available diet provided to both groups.

| New Formulation Ingredients (mg/g) |           |
|------------------------------------|-----------|
| Crude Protein (min.)               | 22.0%     |
| Crude Fat (min.)                   | 12.0%     |
| Crude Fiber (max.)                 | 4.1%      |
| Moisture (max.)                    | 10.0%     |
| Eicosapentaenoic Acid (EPA) (min.) | 0.17%     |
| Docosahexaenoic Acid (DHA) (min.)  | 0.07%     |
| Glucosamine* (min.)                | 818 mg/kg |
| Chondroitin sulfate* (min.)        | 8 mg/kg   |

\*Not recognized as an essential nutrient by the AAFCO Dog Food Nutrient Profiles

Supplemental Table 2: Composition of the tested supplement and the placebo

| New Formulation Ingredients (mg/g) |        |
|------------------------------------|--------|
| <i>Lentinula edodes</i>            | 10.0   |
| Quercetin                          | 13.5   |
| Bromelain                          | 13.5   |
| Maltodextrin                       | 583.4  |
| Appetite stimulants                | 379.6  |
| Total                              | 1000.0 |
| Placebo ingredients (mg/g)         |        |
| Maltodextrin                       | 1000.0 |

11

Supplemental Table 3: Differentially abundant ASVs by time within dogs in the control group as determined by ANCOM-BC (T0 vs T28).

13

14

| Taxonomic classification             | Higher Abundance Timepoint | Log2-Fold Change | Standard deviation | W statistic | p-value | Corrected p-value | ASV_code |
|--------------------------------------|----------------------------|------------------|--------------------|-------------|---------|-------------------|----------|
| Lachnospiraceae_unclassified         | T0                         | -0.040           | 0.014              | -2.862      | 0.004   | 0.081             | ASV002   |
| Clostridiales_unclassified           | T0                         | -0.036           | 0.013              | -2.767      | 0.006   | 0.081             | ASV349   |
| Lachnospiraceae_unclassified         | T0                         | -0.054           | 0.013              | -4.228      | 0.000   | 0.006             | ASV781   |
| <i>Ruminococcus lactaris</i>         | T28                        | 0.037            | 0.012              | 3.114       | 0.002   | 0.058             | ASV969   |
| Fusobacteria_unclassified            | T0                         | -0.058           | 0.021              | -2.752      | 0.006   | 0.081             | ASV029   |
| <i>Collinsella stercoris</i>         | T28                        | 0.042            | 0.015              | 2.808       | 0.005   | 0.081             | ASV259   |
| <i>Paraeggerthella hongkongensis</i> | T28                        | 0.045            | 0.017              | 2.670       | 0.008   | 0.089             | ASV527   |
| Coriobacteriaceae_unclassified       | T28                        | 0.021            | 0.008              | 2.697       | 0.007   | 0.088             | ASV345   |
| <i>Bifidobacterium</i> sp            | T28                        | 0.019            | 0.007              | 2.786       | 0.005   | 0.081             | ASV018   |
| <i>Bifidobacterium animalis</i>      | T28                        | 0.054            | 0.020              | 2.743       | 0.006   | 0.081             | ASV117   |
| <i>Bifidobacterium</i> sp            | T28                        | 0.047            | 0.016              | 3.035       | 0.002   | 0.058             | ASV772   |
| Lactobacillaceae_unclassified        | T28                        | 0.084            | 0.027              | 3.132       | 0.002   | 0.058             | ASV256   |
| Lactobacillaceae_unclassified        | T28                        | 0.057            | 0.016              | 3.565       | 0.000   | 0.029             | ASV585   |
| Lactobacillaceae_unclassified        | T28                        | 0.100            | 0.029              | 3.418       | 0.001   | 0.038             | ASV098   |
| <i>Lactobacillus hamsteri</i>        | T28                        | 0.081            | 0.025              | 3.211       | 0.001   | 0.058             | ASV440   |
| <i>Streptococcus equi</i>            | T28                        | 0.080            | 0.026              | 3.042       | 0.002   | 0.058             | ASV222   |
| <i>Anaerorhabdus furcosa</i>         | T0                         | -0.034           | 0.012              | -2.818      | 0.005   | 0.081             | ASV086   |
| <i>Eubacterium</i> sp                | T0                         | -0.048           | 0.018              | -2.660      | 0.008   | 0.089             | ASV825   |
| Erysipelotrichaceae_unclassified     | T28                        | 0.056            | 0.021              | 2.644       | 0.008   | 0.089             | ASV255   |
| <i>Enterococcus cecorum</i>          | T28                        | 0.035            | 0.012              | 2.836       | 0.005   | 0.081             | ASV036   |
| <i>Pediococcus</i> sp                | T28                        | 0.050            | 0.016              | 3.081       | 0.002   | 0.058             | ASV844   |
| <i>Lactobacillus</i> sp              | T28                        | 0.102            | 0.026              | 3.880       | 0.000   | 0.013             | ASV046   |

15

Supplementary Figure 1: Rarefaction curves for all samples for treated and control groups

16

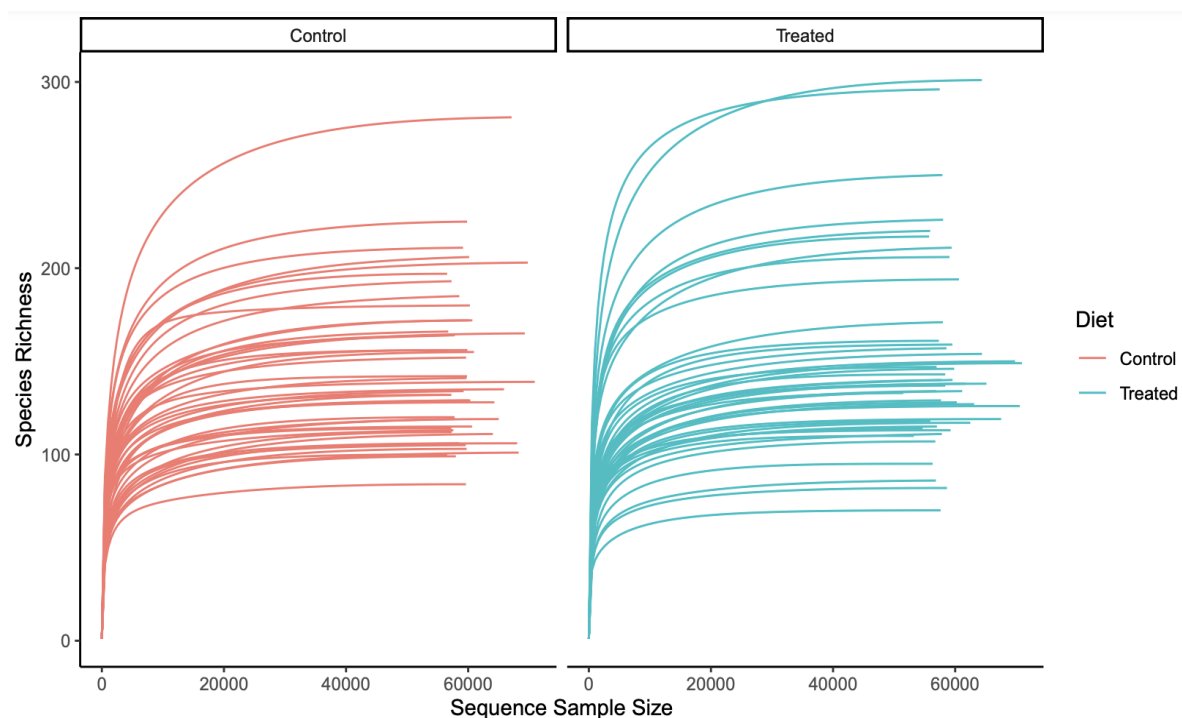

17

18

Supplementary Figure 2: Alpha diversity analysis of treated vs control groups at T0, T28 and T35

19

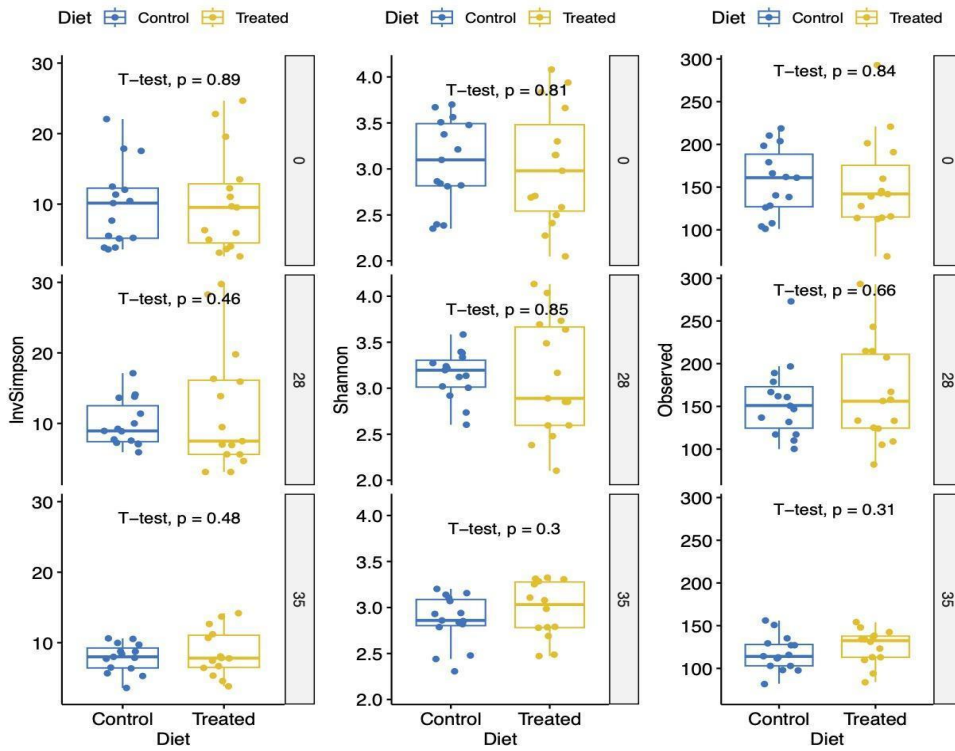

20

21

22

Supplementary Figure 3: A principal coordinate analysis using Bray-Curtis dissimilarity matrix for  $\beta$  diversity colored by treated and control groups.

23

24

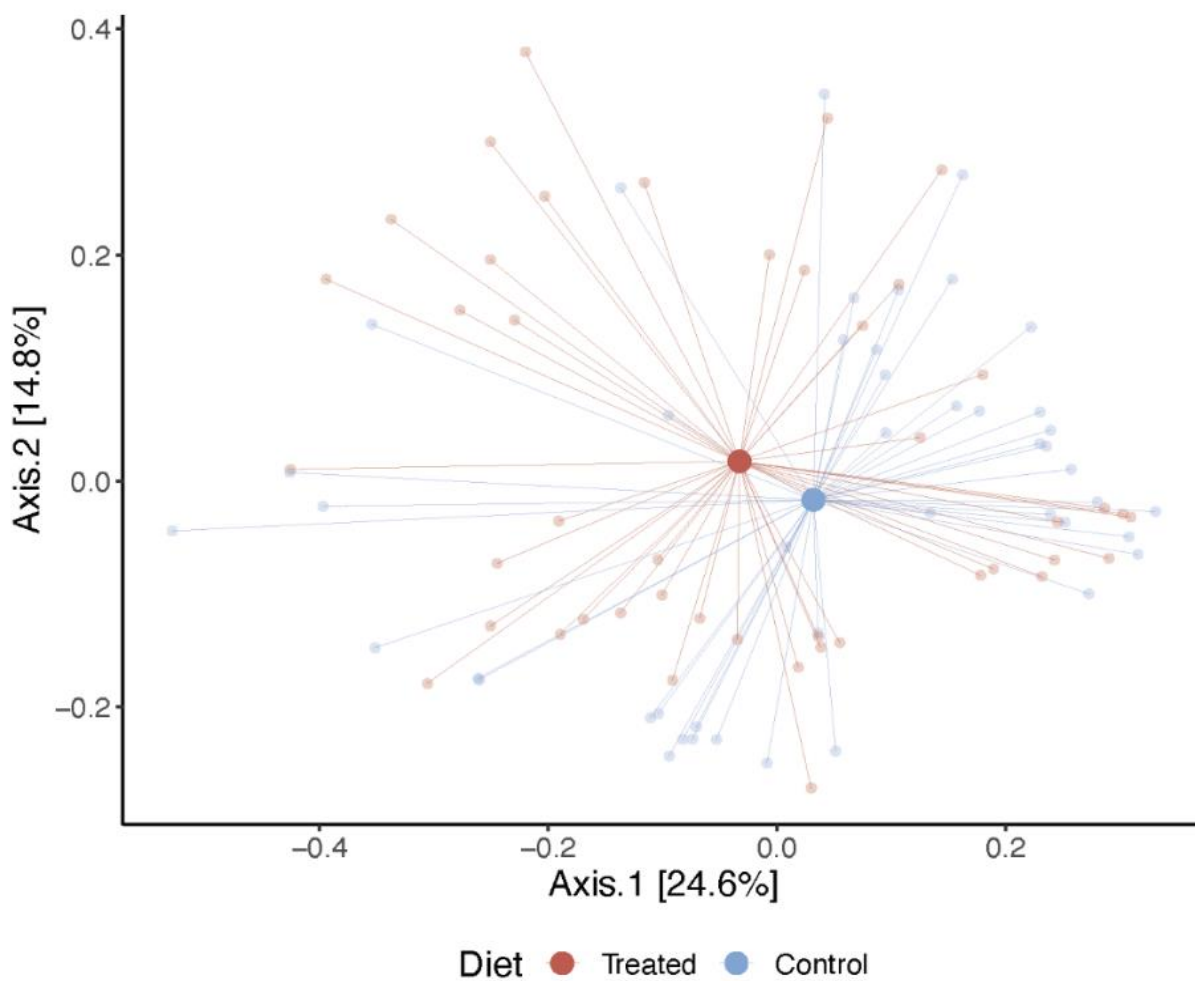

25

26

27

28

29
